# Supplementary material for: Selective photocatalytic oxidation of aromatic alcohols to aldehydes with air by magnetic WO3ZnO/Fe3O4. In situ photochemical synthesis of 2-substituted benzimidazoles
Source: Royal Society of Chemistry journal article supplement (doi:10.1039/d0ra08403d), 2020-01-01
Supplement: d0ra08403d3.pdf [file d0ra08403d3.pdf]

## Supporting Information

### Selective photocatalytic oxidation of aromatic alcohols to aldehydes with air by magnetic $\text{WO}_3\text{ZnO}/\text{Fe}_3\text{O}_4$ . *In situ* photochemical synthesis of 2-substituted benzimidazoles

Bozhi Li<sup>1</sup>, Reza Tayebee<sup>\*.2</sup>, Effat Esmaeili<sup>3</sup>, Mina Shafiee<sup>2</sup>, Behrooz Maleki<sup>2</sup>

<sup>1</sup>Department of Food Science and Engineering, Jinzhou Medical University, Jinzhou, China

<sup>2</sup>Department of Chemistry, School of Sciences, Hakim Sabzevari University, Sabzevar, 96179-76487, Iran

<sup>3</sup>Department of Chemistry, Payame Noor University (PNU), Tehran, 19395-4697, Iran

#### General

<sup>1</sup>H- and <sup>13</sup>C-NMR spectra were recorded on a 300 MHz Bruker AVANCEC III spectrometer in DMSO-*d*<sub>6</sub> using TMS as the internal reference.

Dr. Tayebi -Code 13

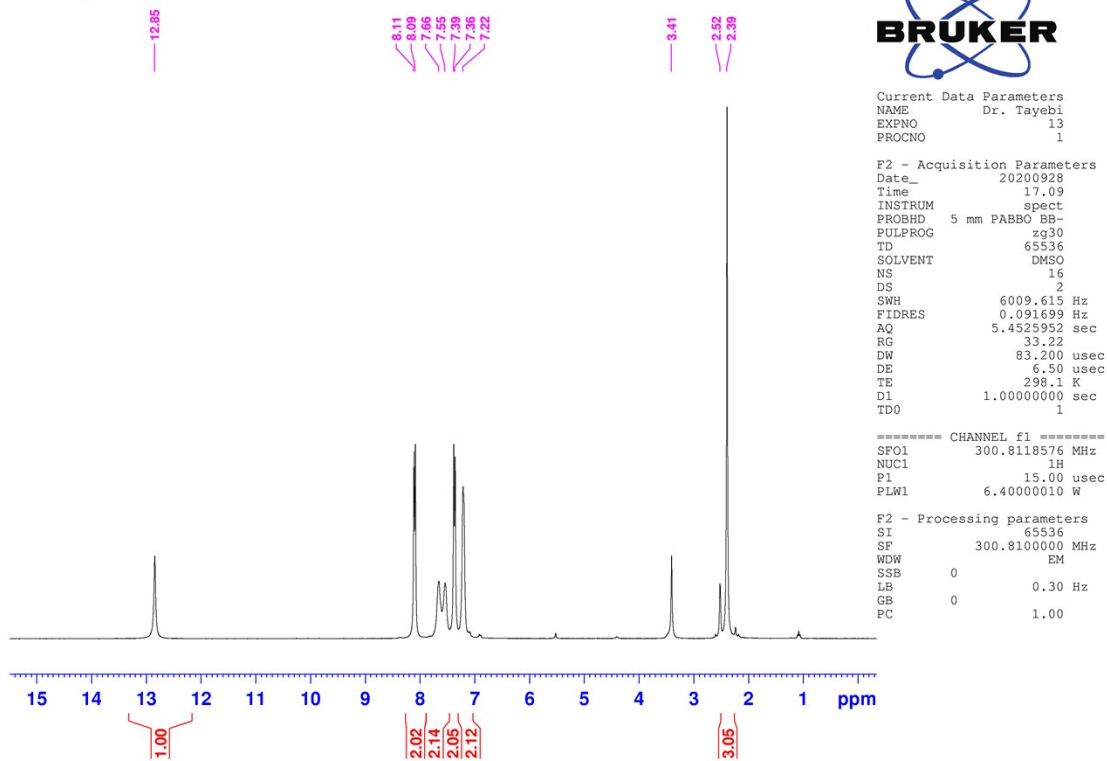

**Fig. S1**  $^1\text{H}$ -NMR Spectrum of 2-(4-methyl-phenyl)-benzimidazole (Table 2, entry 1).

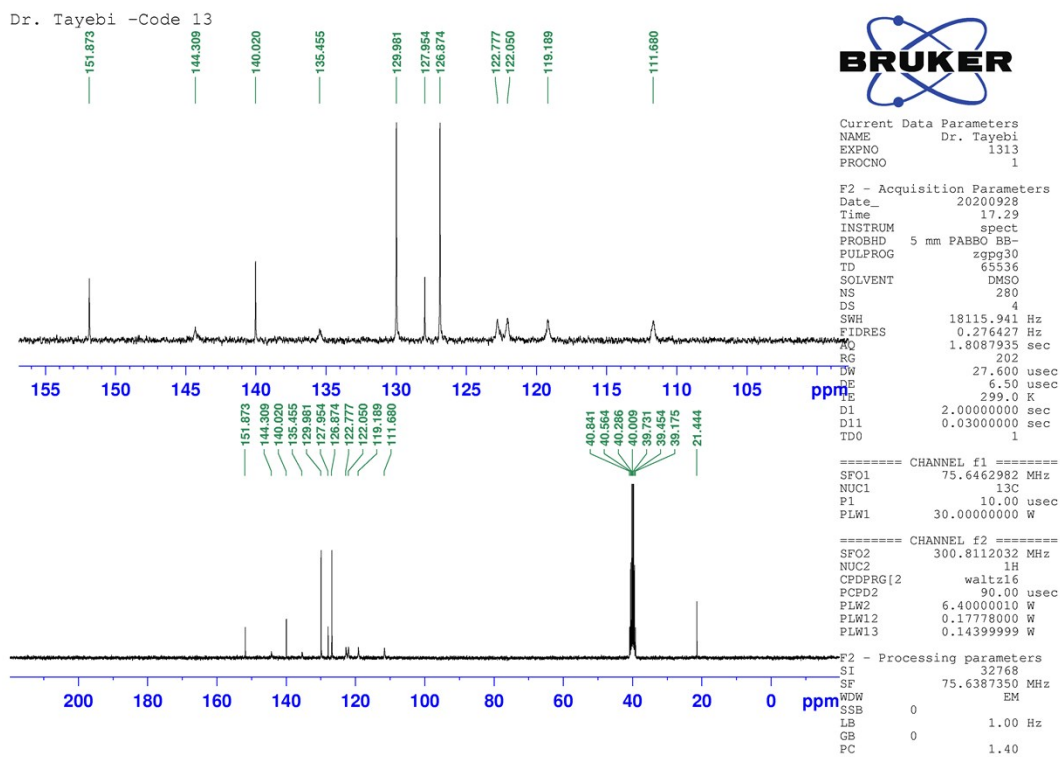

**Fig. S2**  $^{13}\text{C}$ -NMR Spectrum of 2-(4-methyl-phenyl)-benzimidazole (Table 2, entry 1)

Dr. Tayebi -Code 4-Br

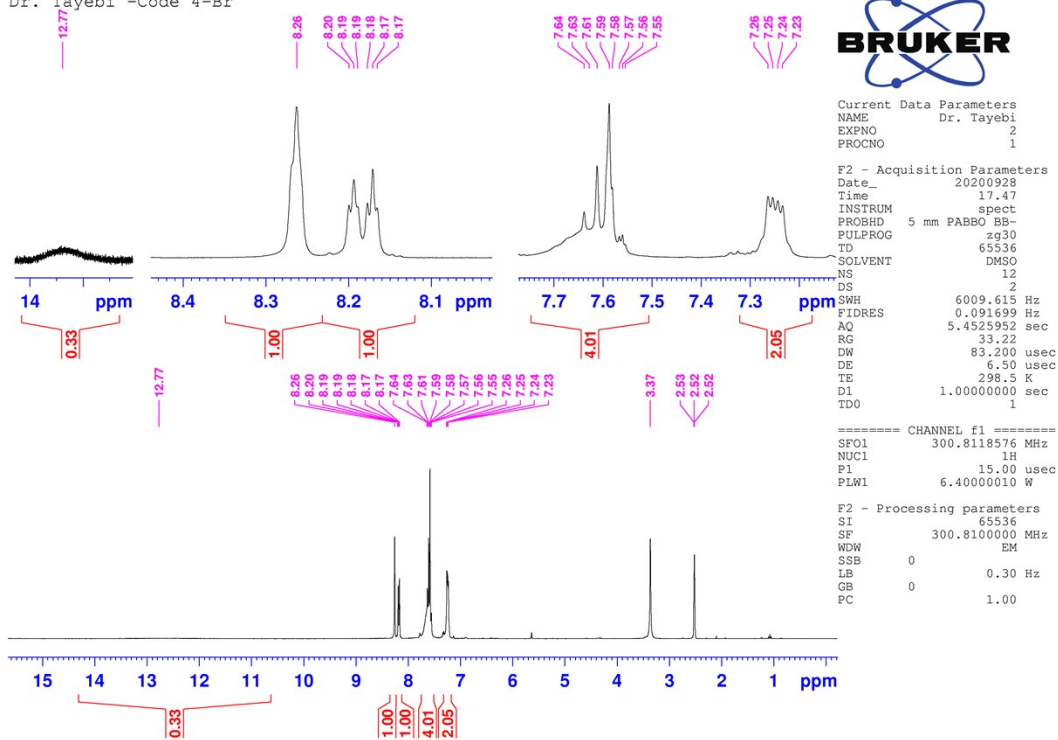

Fig. S3 <sup>1</sup>H-NMR Spectrum of 2-(4-bromo-phenyl)-benzimidazole (Table 2, entry 2)

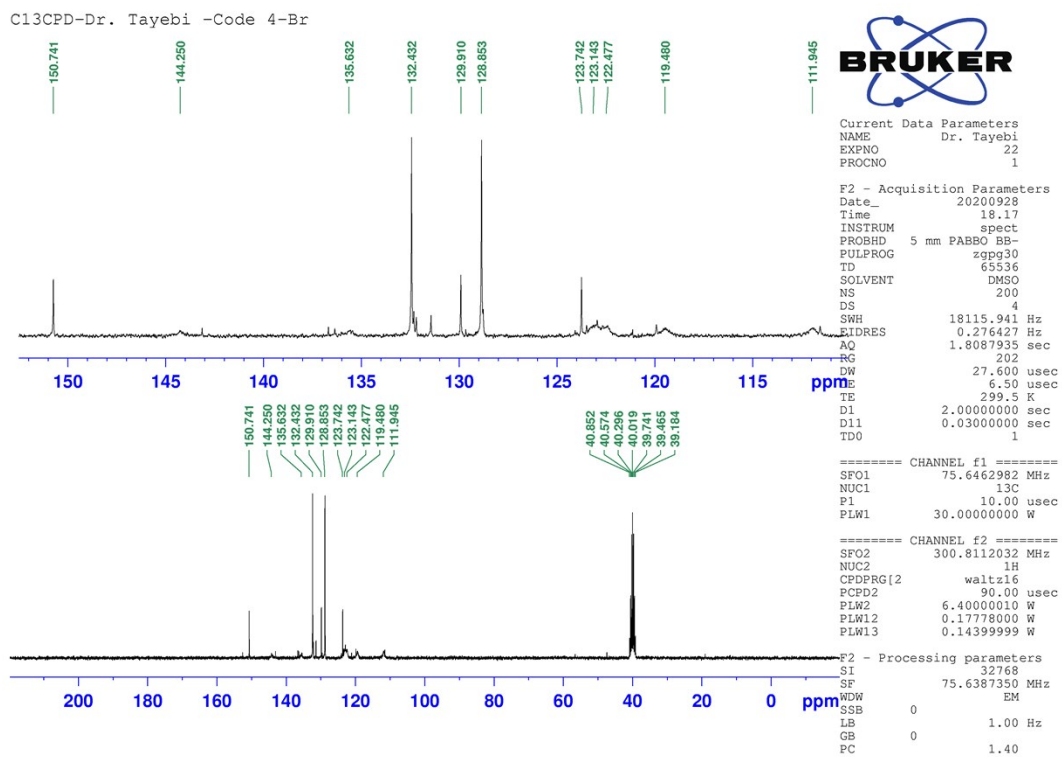

**Fig. S4**  $^{13}\text{C}$ -NMR Spectrum of 2-(4-bromo-phenyl)-benzimidazole (Table 2, entry 2)

Dr. Tayebi- code 4-C1-

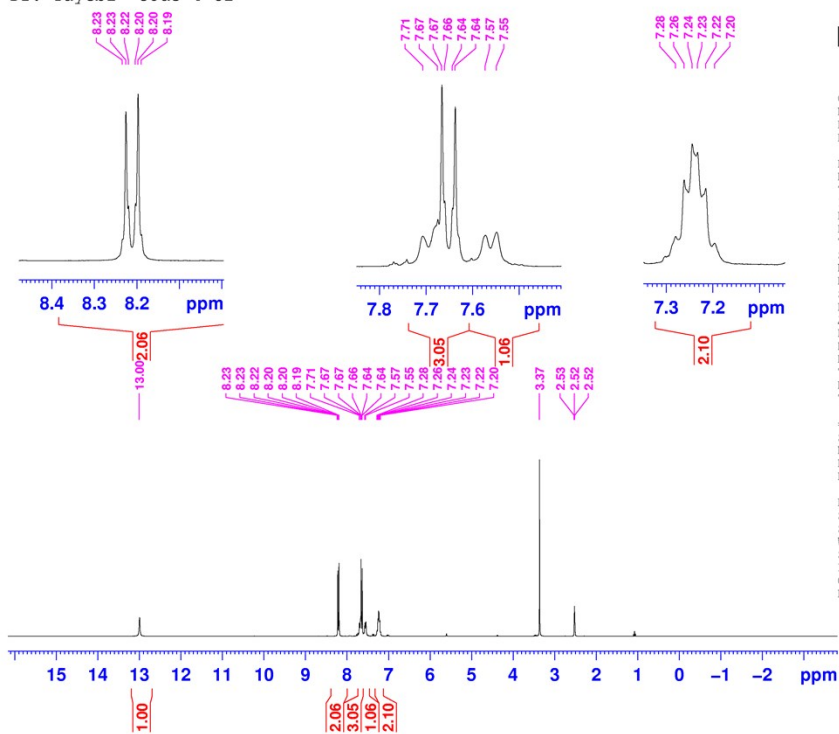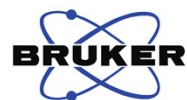

Current Data Parameters  
NAME Dr. Tayebi- code 14  
EXPNO 7  
PROCNO 1

F2 - Acquisition Parameters  
Date\_ 20200929  
Time\_ 20.26  
INSTRUM spect  
PROBHD 5 mm PABBO BB-  
PULPROG zg30  
TD 65536  
SOLVENT DMSO  
NS 8  
DS 2  
SWH 6009.615 Hz  
FIDRES 0.091699 Hz  
AQ 5.452592 sec  
RG 33.22  
DW 83.200 usec  
DE 6.50 usec  
TE 298.3 K  
D1 1.00000000 sec  
TDO 1

==== CHANNEL f1 =====  
SF01 300.8118576 MHz  
NUC1 1H  
P1 15.00 usec  
PLW1 6.40000010 W

F2 - Processing parameters  
SI 65536  
SF 300.8100000 MHz  
WDW EM  
SSB 0  
LB 0.30 Hz  
GB 0  
PC 1.00

Fig. S5 <sup>1</sup>H-NMR Spectrum of 2-(4-chloro-phenyl)-benzimidazole (Table 2, entry 3)

C13CPD-Dr. Tayebi -Code 4-C1

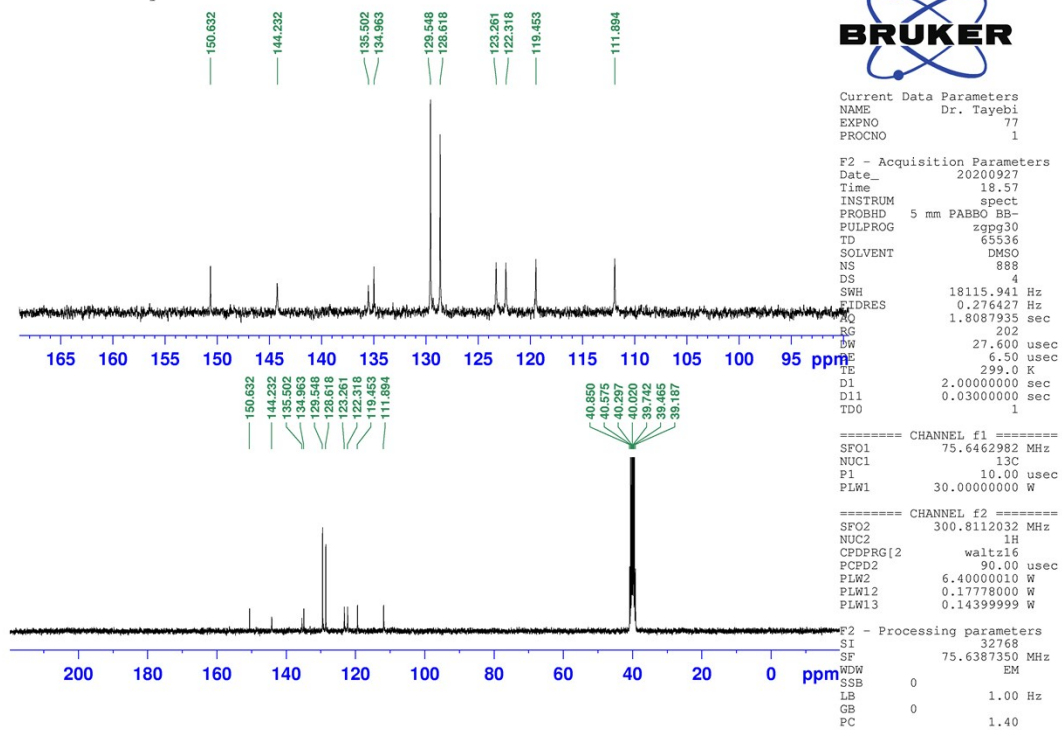

Fig. S6  $^{13}\text{C}$ -NMR Spectrum of 2-(4-chloro-phenyl)-benzimidazole (Table 2, entry 3)

Dr. Tayebi -Code 2-C1

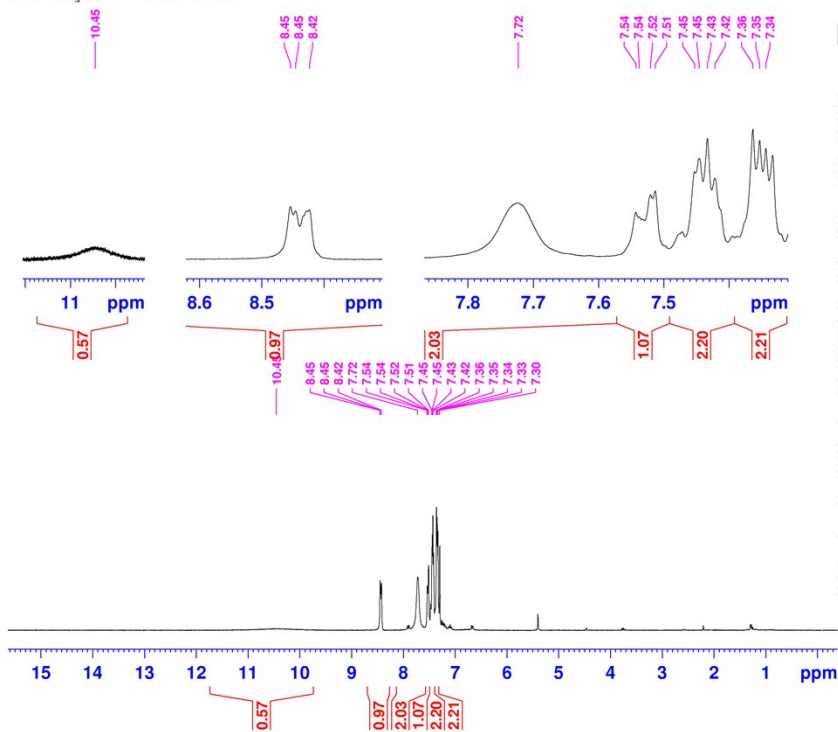

Current Data Parameters  
NAME Dr. Tayebi  
EXPNO 12  
PROCNO 1

F2 - Acquisition Parameters  
Date\_ 20200925  
Time\_ 20.17  
INSTRUM spect  
PROBHD 5 mm PABBO BB-  
PULPROG zg30  
TD 65536  
SOLVENT CDC13  
NS 200  
DS 2  
SWH 6009.615 Hz  
FIDRES 0.091699 Hz  
AQ 5.4525952 sec  
RG 79.22  
DW 83.200 usec  
DE 6.50 usec  
TE 299.3 K  
D1 1.00000000 sec  
TDO 1

==== CHANNEL f1 =====  
SF01 300.8118576 MHz  
NUC1 1H  
P1 15.00 usec  
PLW1 6.40000010 W

F2 - Processing parameters  
SI 65536  
SF 300.8100000 MHz  
WDW EM  
SSB 0  
LB 0.30 Hz  
GB 0  
PC 1.00

Fig. S7 <sup>1</sup>H-NMR Spectrum of 2-(2-chloro-phenyl)-benzimidazole (Table 2, entry 4)



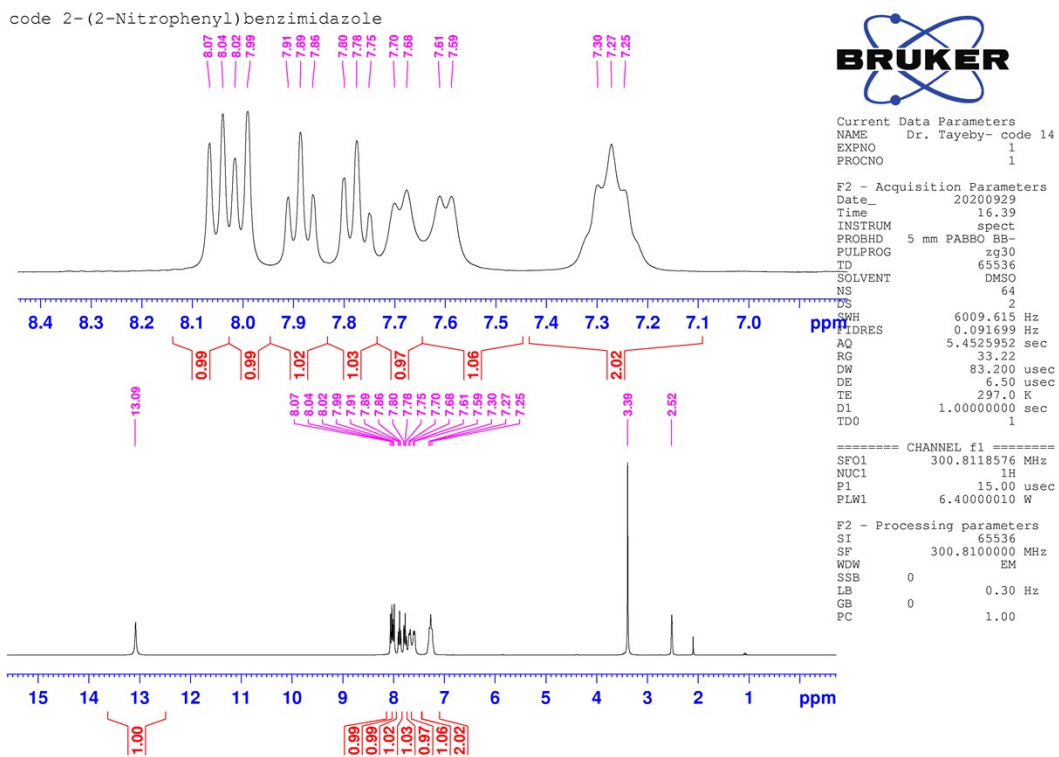

**Fig. S8**  $^1\text{H-NMR}$  Spectrum of 2-(2-nitro-phenyl)-benzimidazole (Table 2, entry 5)

Dr. Tayebi- code 2-(2-Nitrophenyl)benzimidazole

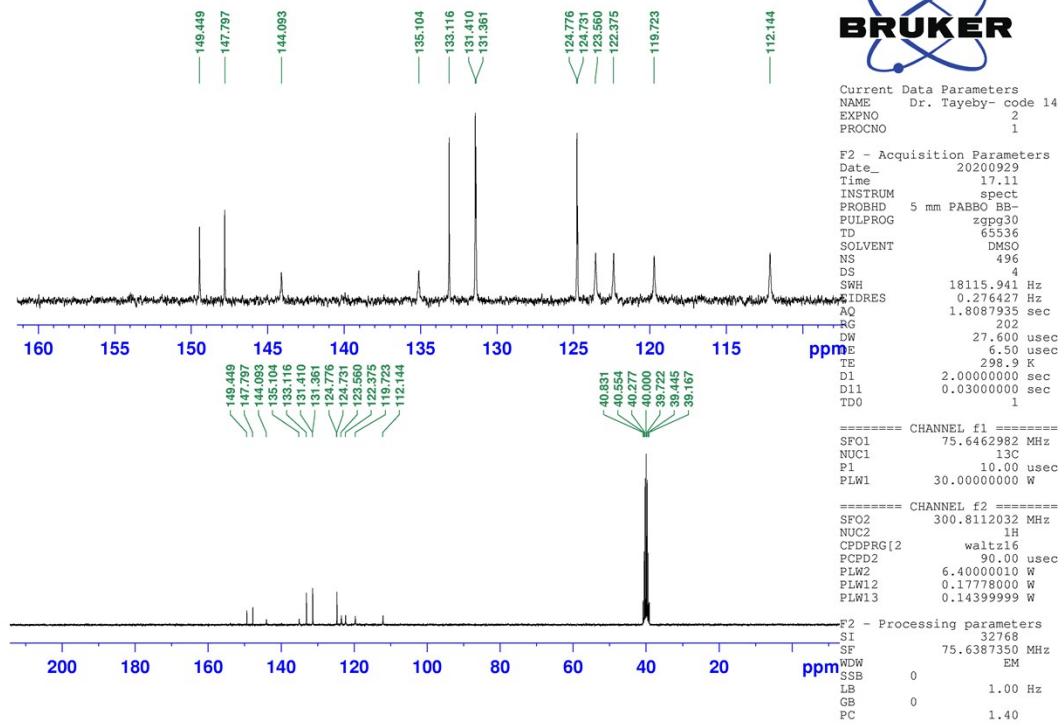

**Fig. S9**  $^{13}\text{C}$ -NMR Spectrum of 2-(2-nitro-phenyl)-benzimidazole (Table 2, entry 5)

Dr. Tayebi- code 2,6-diCl

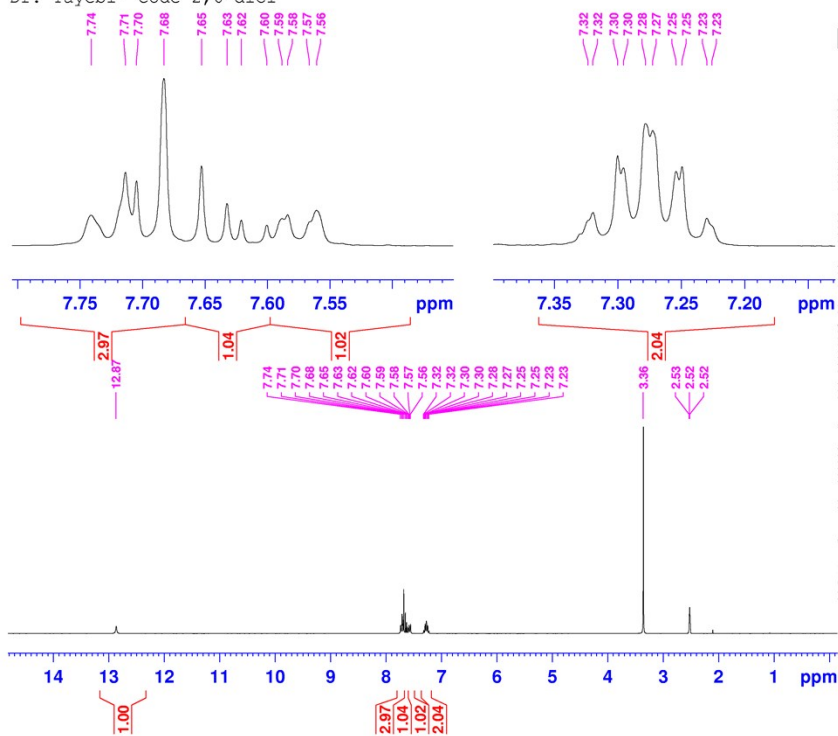

Current Data Parameters  
NAME Dr. Tayebi  
EXPNO 13  
PROCNO 1

F2 - Acquisition Parameters  
Date\_ 20201001  
Time 14.58  
INSTRUM spect  
PROBHD 5 mm PABBO BB-  
PULPROG zg30  
TD 65536  
SOLVENT DMSO  
NS 16  
DS 2  
SWH 6009.615 Hz  
FIDRES 0.091699 Hz  
AQ 5.4525952 sec  
RG 33.22  
DW 83.200 usec  
DE 6.50 usec  
TE 298.6 K  
D1 1.00000000 sec  
TDO 1

==== CHANNEL f1 =====  
SF01 300.8118576 MHz  
NUC1 1H  
P1 15.00 usec  
PLW1 6.40000010 W

F2 - Processing parameters  
SI 65536  
SF 300.8100000 MHz  
WDW EM  
SSB 0  
LB 0.30 Hz  
GB 0  
PC 1.00

Fig. S10 <sup>1</sup>H-NMR Spectrum of 2-(2, 6-dichloro-phenyl)-benzimidazole (Table 2, entry 6)

C13CPD- Dr. Tayebi- code 2,6-diCl

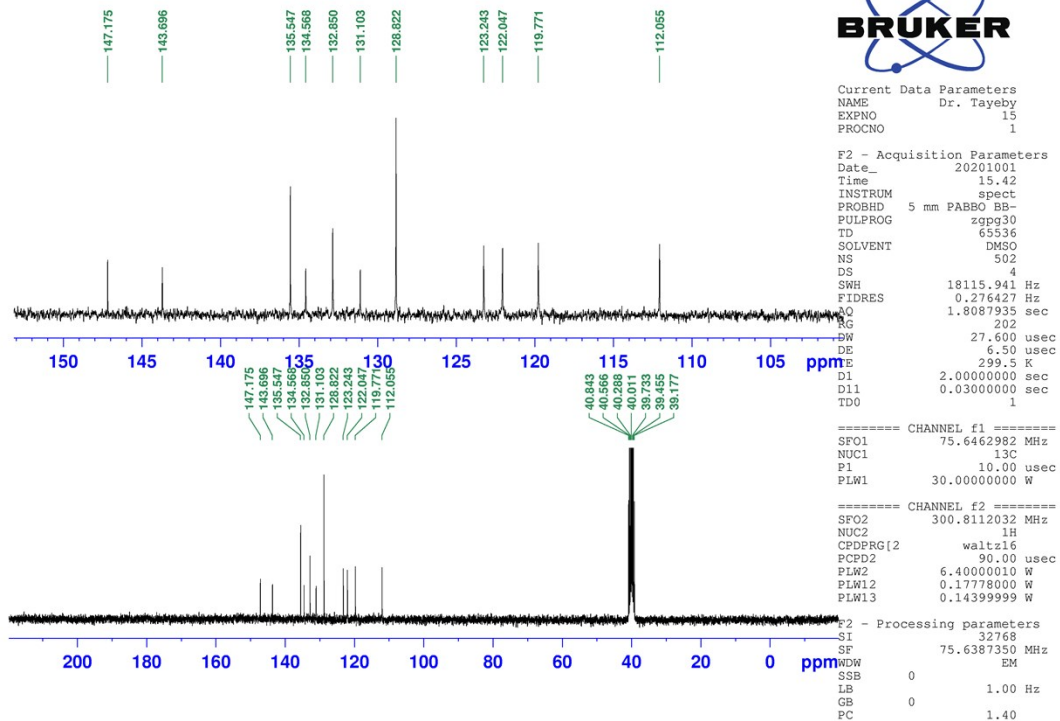

Fig. S11  $^{13}\text{C}$ -NMR Spectrum of 2-(2, 6-dichloro-phenyl)-benzimidazole (Table 2, entry 6)

Dr. Tayebi -Code 4-NO2

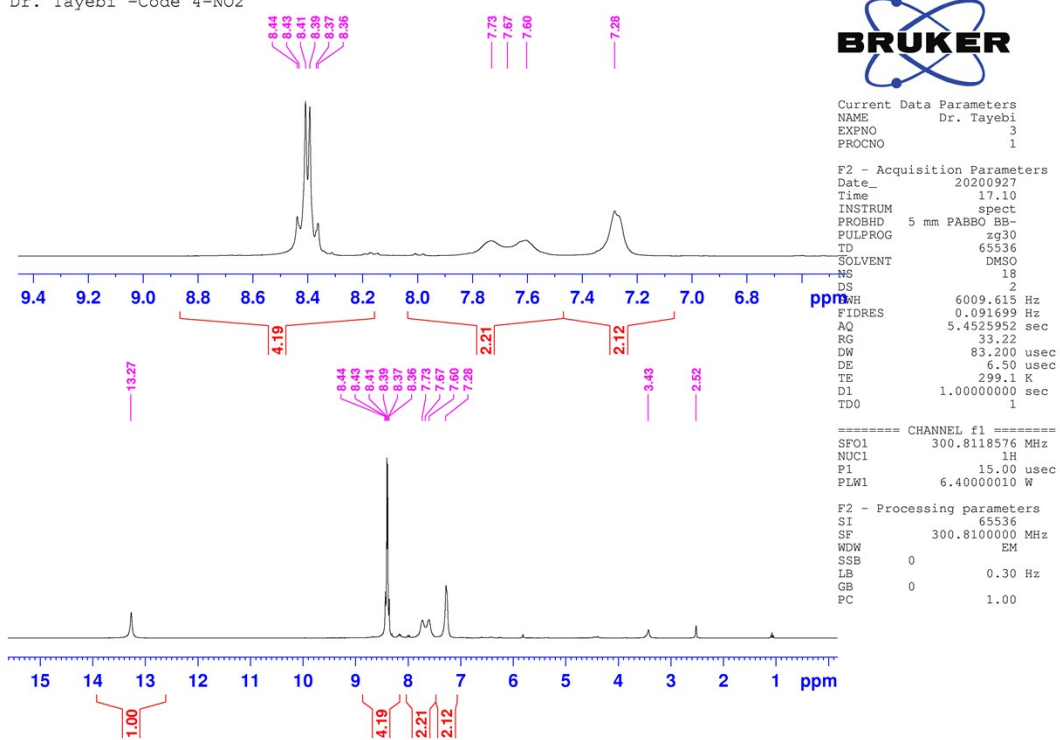

**Fig. S12** <sup>1</sup>H-NMR Spectrum of 2-(4-nitro-phenyl)- benzimidazole (Table 2, entry 7)

Dr. Tayebi -Code 4-NO2

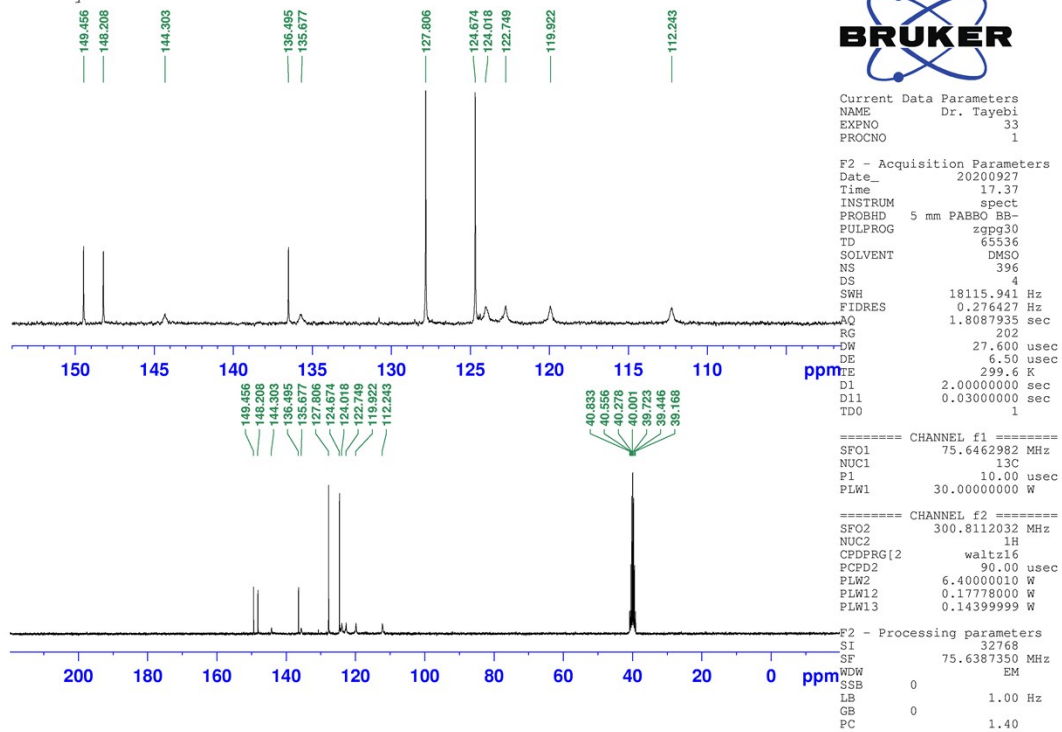

Fig. S13 <sup>13</sup>C-NMR Spectrum of 2-(4-nitro-phenyl)- benzimidazole (Table 2, entry 7)

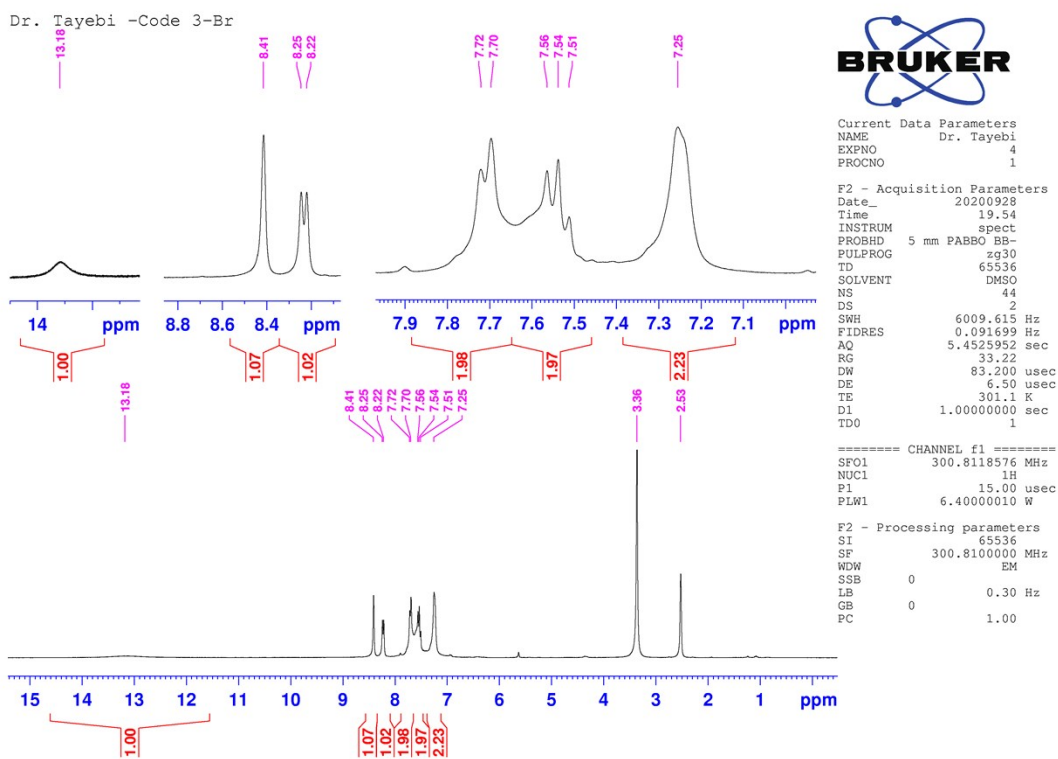

**Fig. S14**  $^1\text{H}$ -NMR Spectrum of 2-(3-bromo-phenyl)-benzimidazole (Table 2, entry 8)

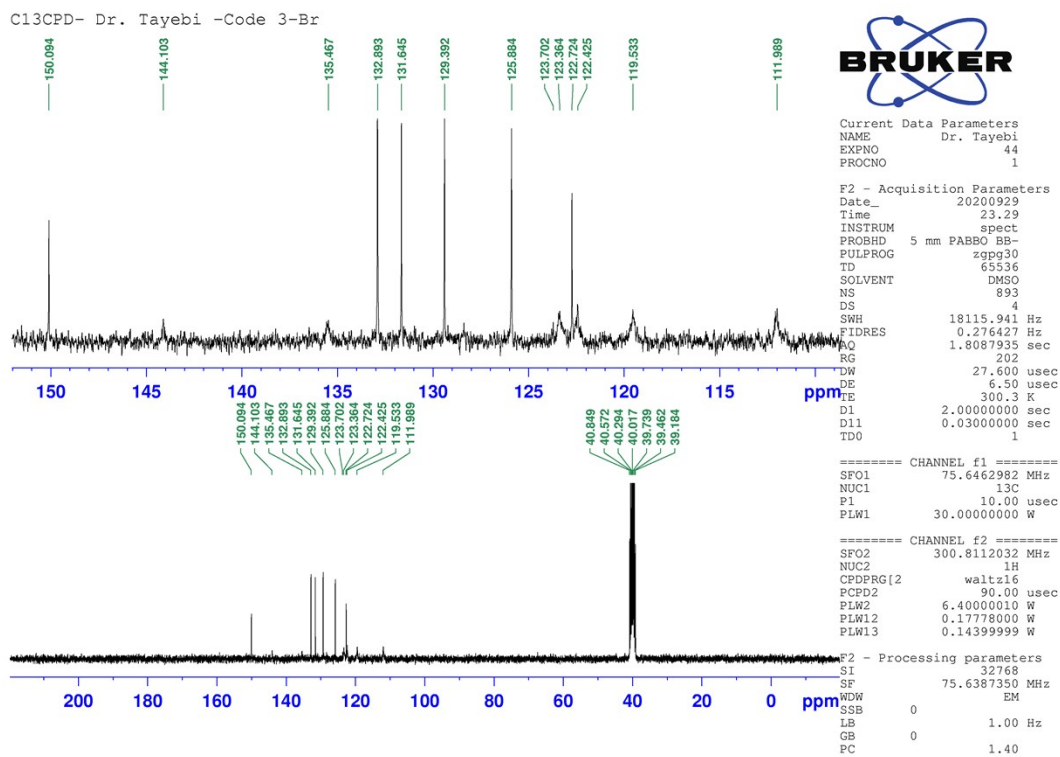

**Fig. S15**  $^{13}\text{C}$ -NMR Spectrum of 2-(3-bromo -phenyl)-benzimidazole (Table 2, entry 8)



Dr. Tayebi -Code 3-C1

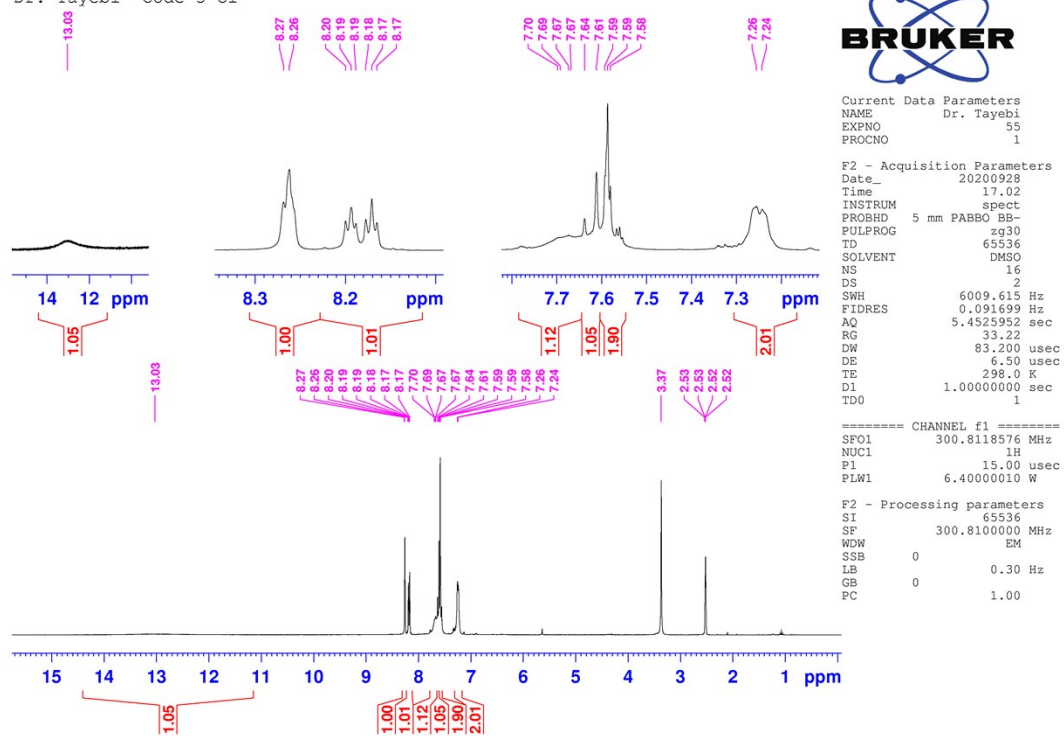

Fig. S16 <sup>1</sup>H-NMR Spectrum of 2-(3-chloro-phenyl)-benzimidazole (Table 2, entry 9)

C13CPD- Dr. Tayebi- code 3-C1

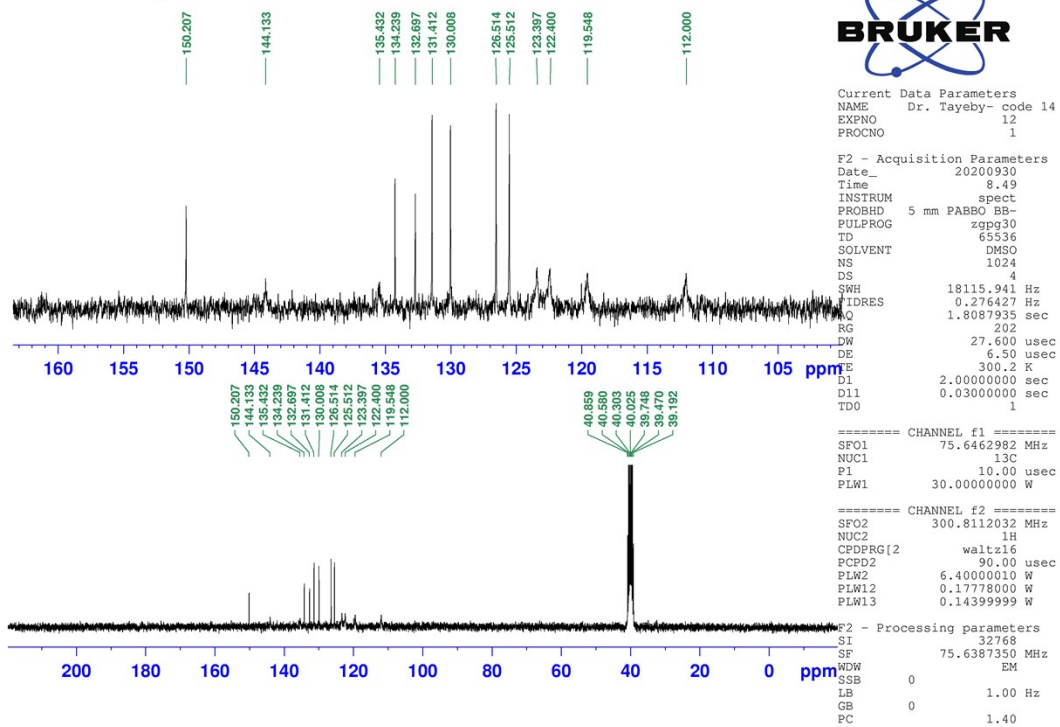

Fig. S17  $^{13}\text{C}$ -NMR Spectrum of 2-(3-chloro-phenyl)-benzimidazole (Table 2, entry 9)

Dr. Tayebi- code 4-Carboxy

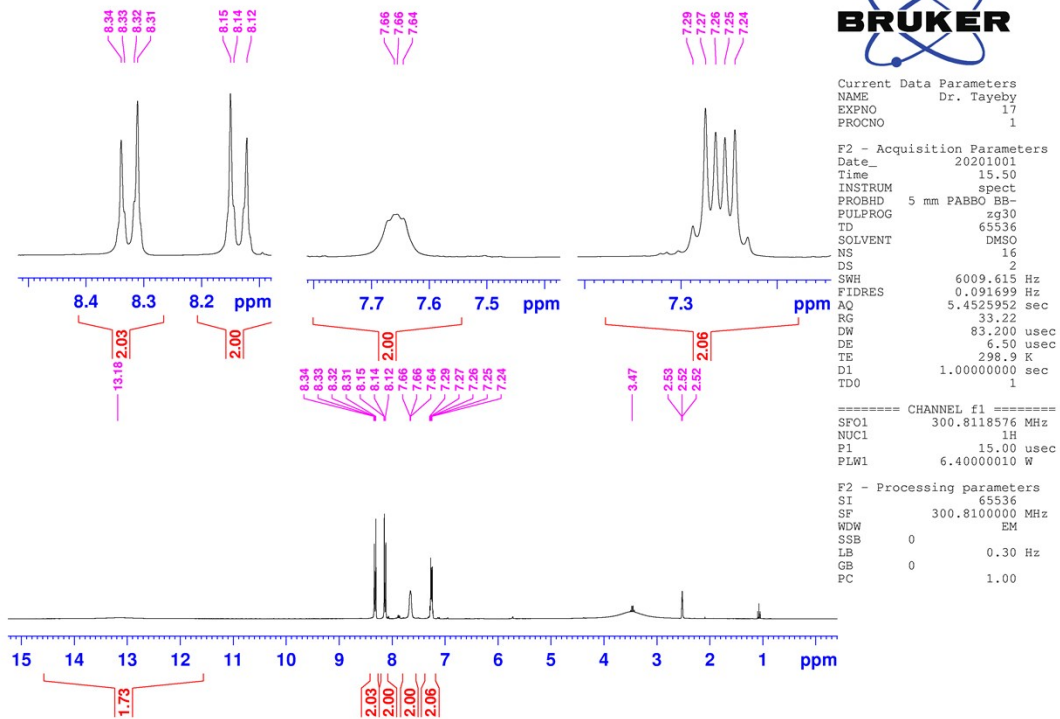

**Fig. S18**  $^1\text{H-NMR}$  Spectrum of 2-(4-carboxy-phenyl)-benzimidazole (Table 2, entry 10)

C13CPD- Dr. Tayebi- code 4-Carboxy

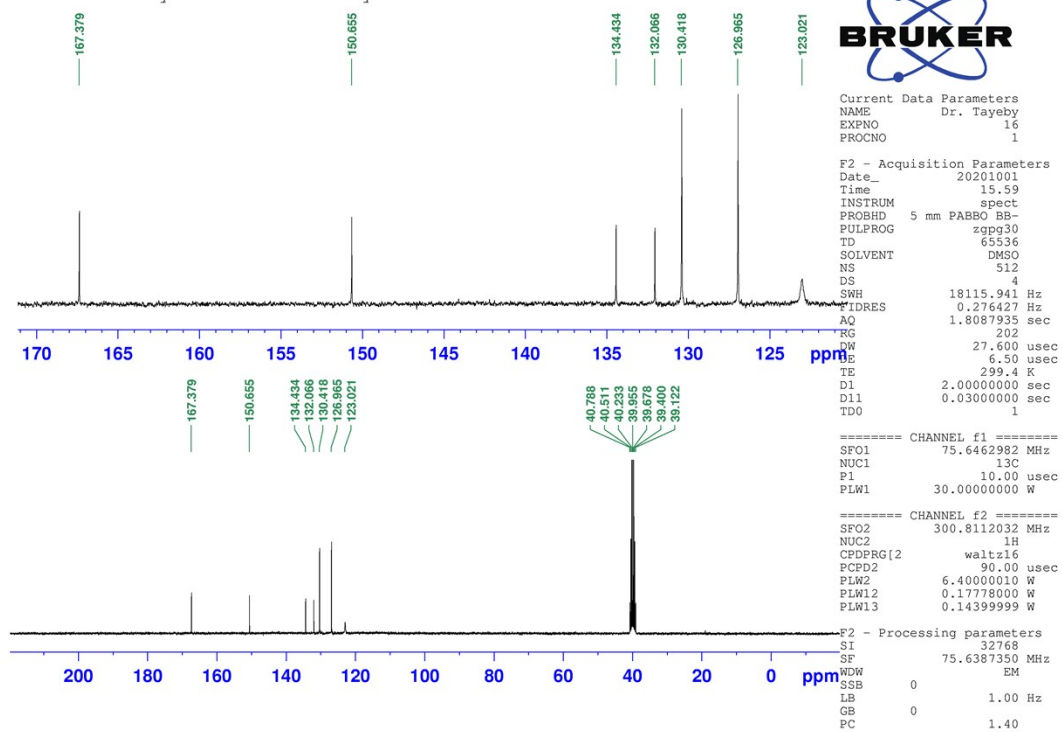

**Fig. S19**  $^{13}\text{C}$ -NMR Spectrum of 2-(4-carboxy-phenyl)-benzimidazole (Table 2, entry 10)

Dr. Tayebi -Code Benz (code 11)-

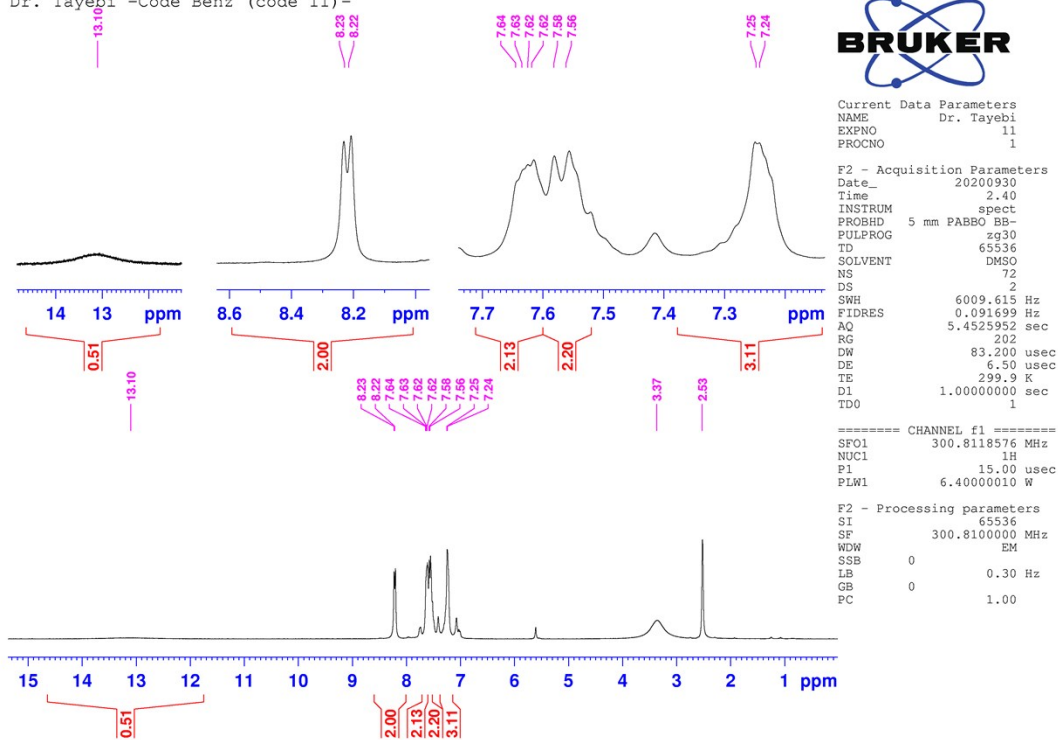

Fig. S20. <sup>1</sup>H-NMR Spectrum of 2-(phenyl)-benzimidazole (Table 2, entry 11)

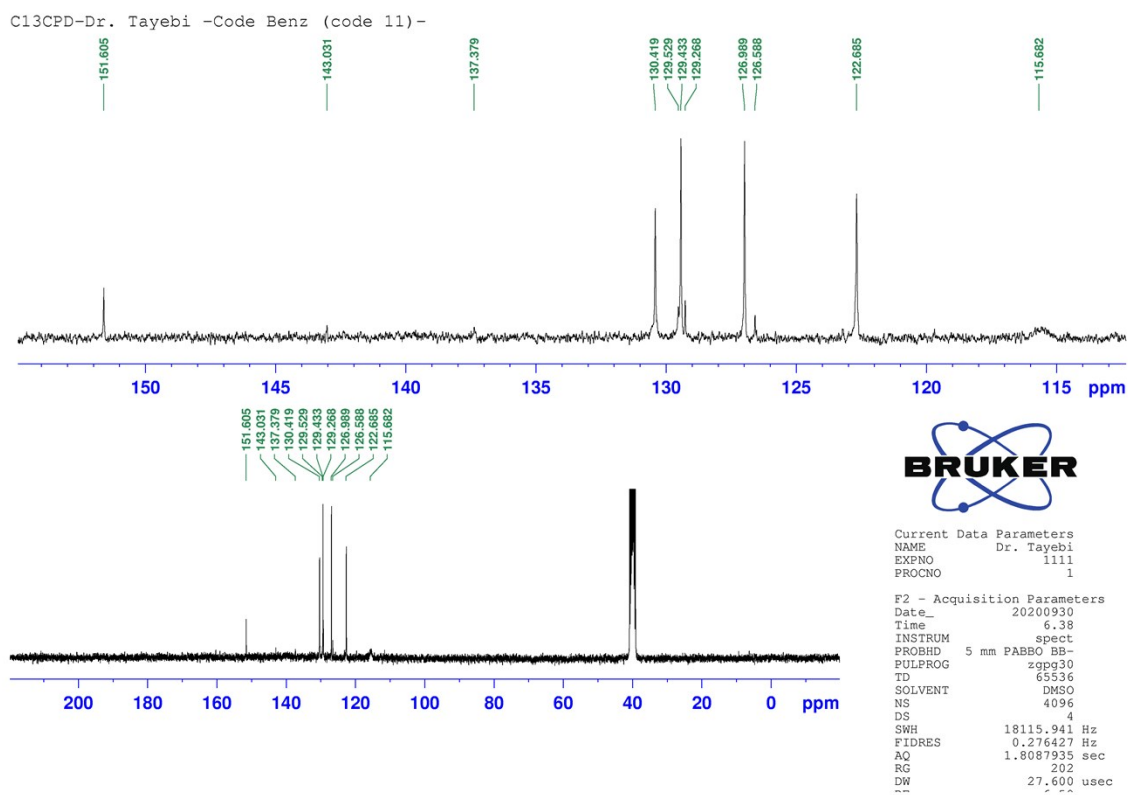

Fig. S21.  $^{13}\text{C}$ -NMR Spectrum of 2-(phenyl)-benzimidazole (Table 2, entry 11)

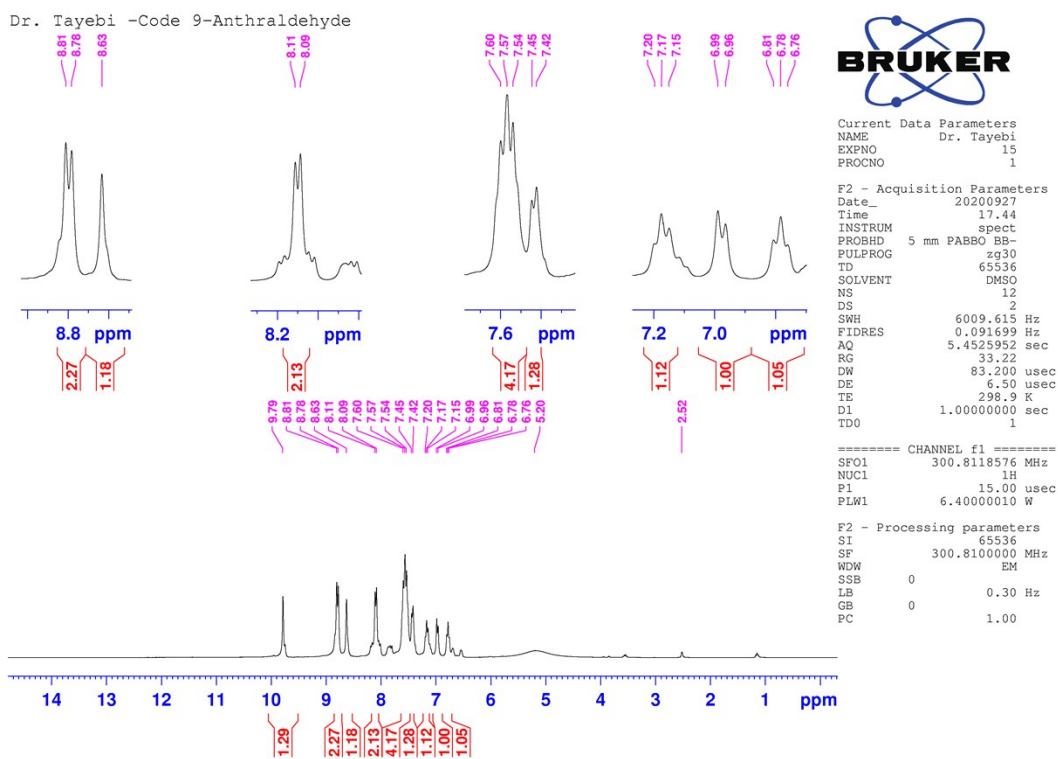

Fig. S22. <sup>1</sup>H-NMR Spectrum of 2-(9-anthracene)-benzimidazole (Table 2, entry 12)

C13CPD- Dr. Tayebi -Code 9-Anthraldehyde

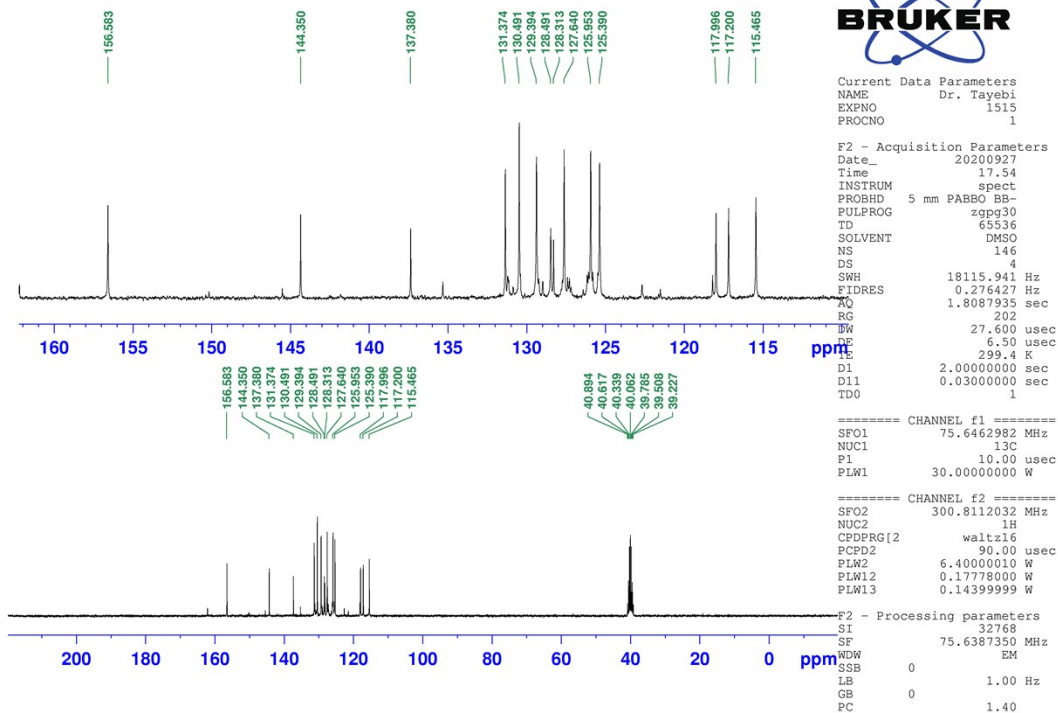

Fig. S23 <sup>13</sup>C-NMR Spectrum of 2-(9-anthracene)-benzimidazole (Table 2, entry 12)



Dr. Tayebi- code 3,4-OH

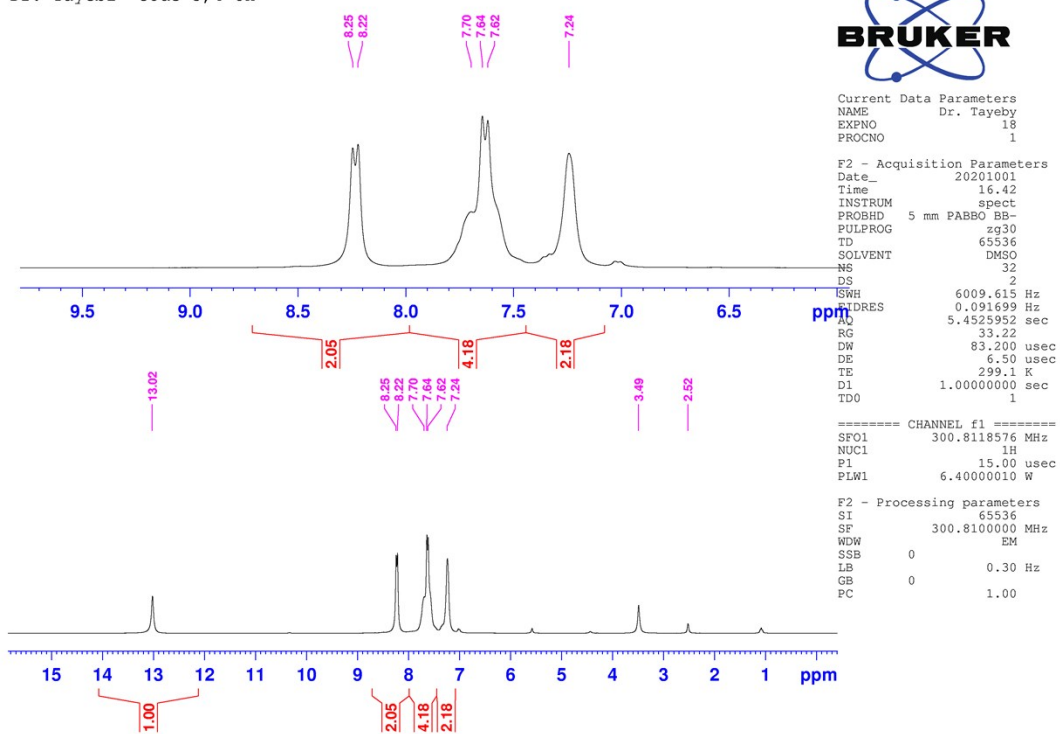

Fig. S24 <sup>1</sup>H-NMR Spectrum of 2-(3,4-dihydroxy-phenyl)-benzimidazole (Table 2, entry 13)

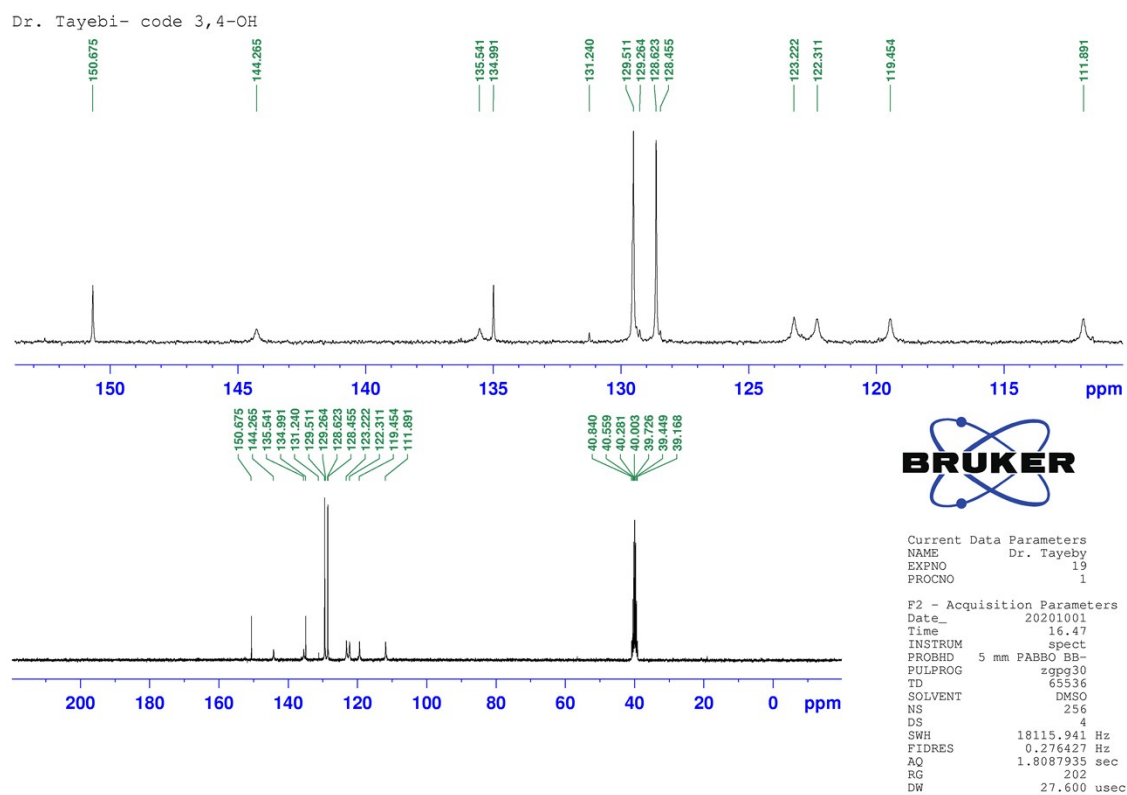

Fig. S25  $^{13}\text{C}$ -NMR Spectrum of 2-(3,4-dihydroxy-phenyl)-benzimidazole (Table 2, entry 13)
